# Supplementary material for: Long-term colonisation with donor bacteriophages following successful faecal microbial transplantation
Source: PubMed Central journal article supplement (PMC6288847; doi:10.1186/s40168-018-0598-x), 2018-12-10

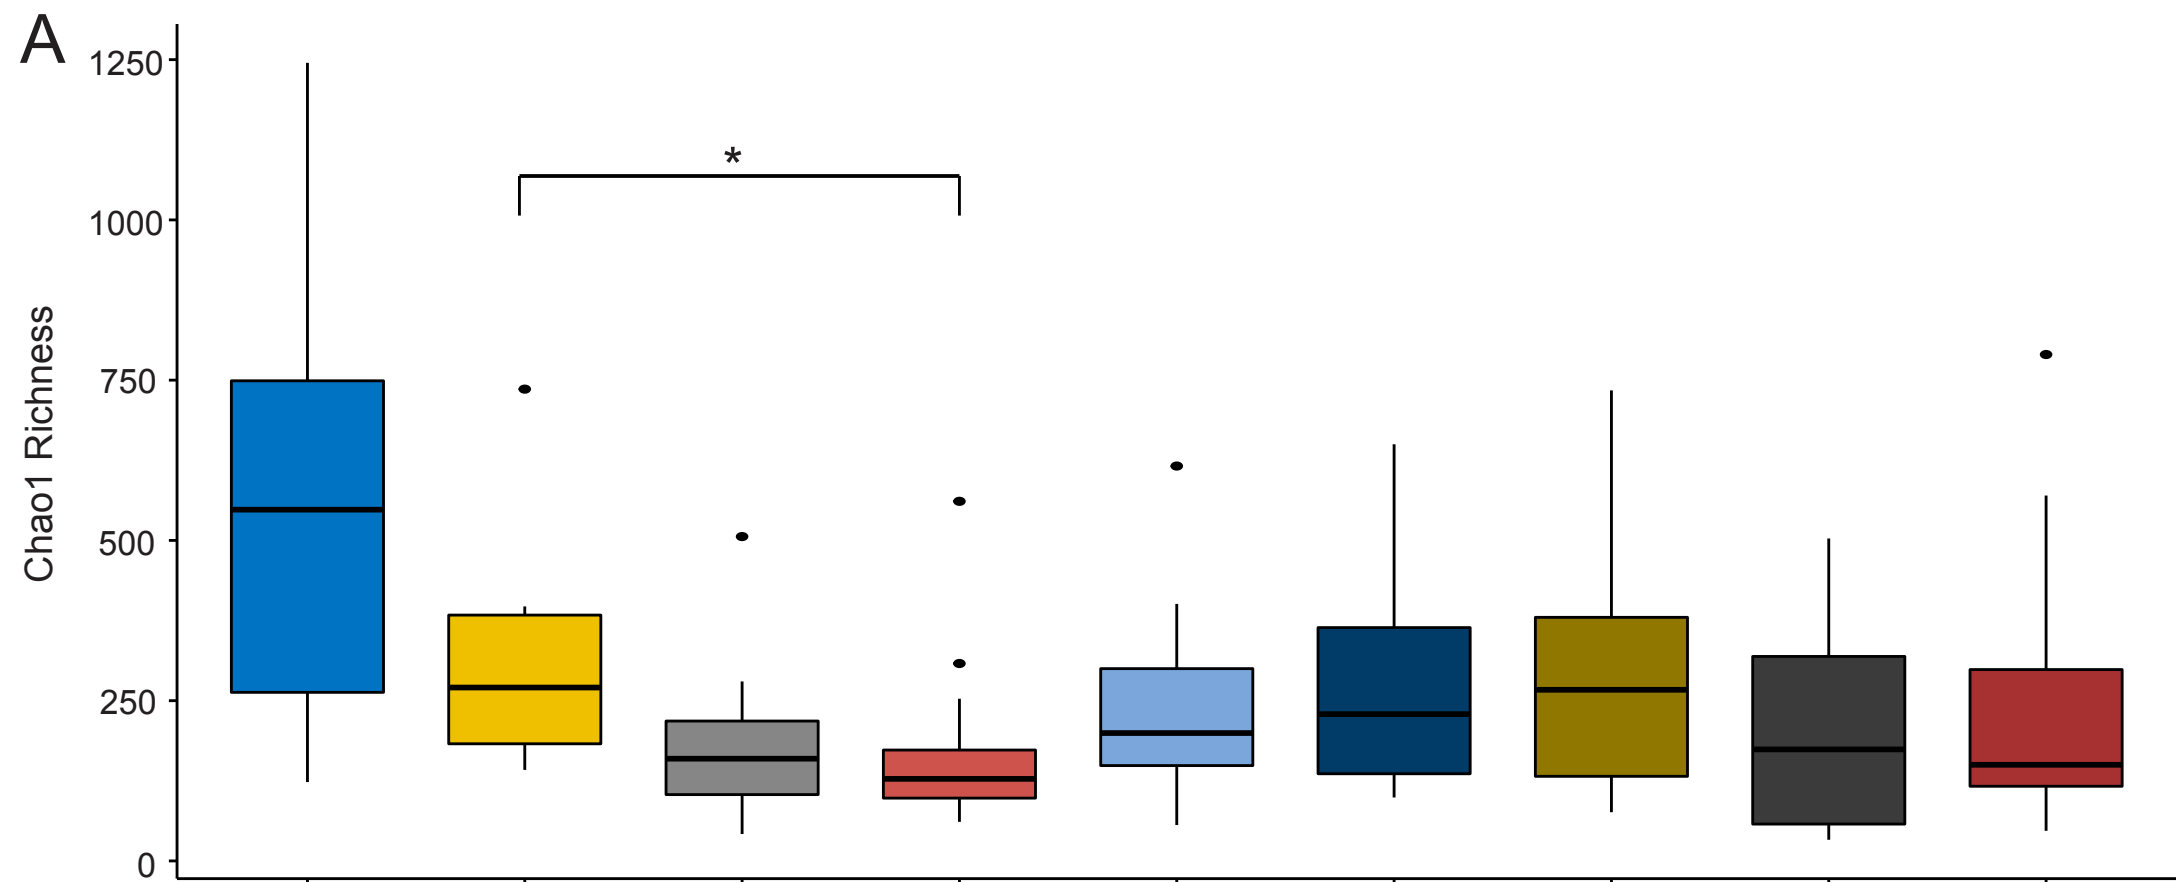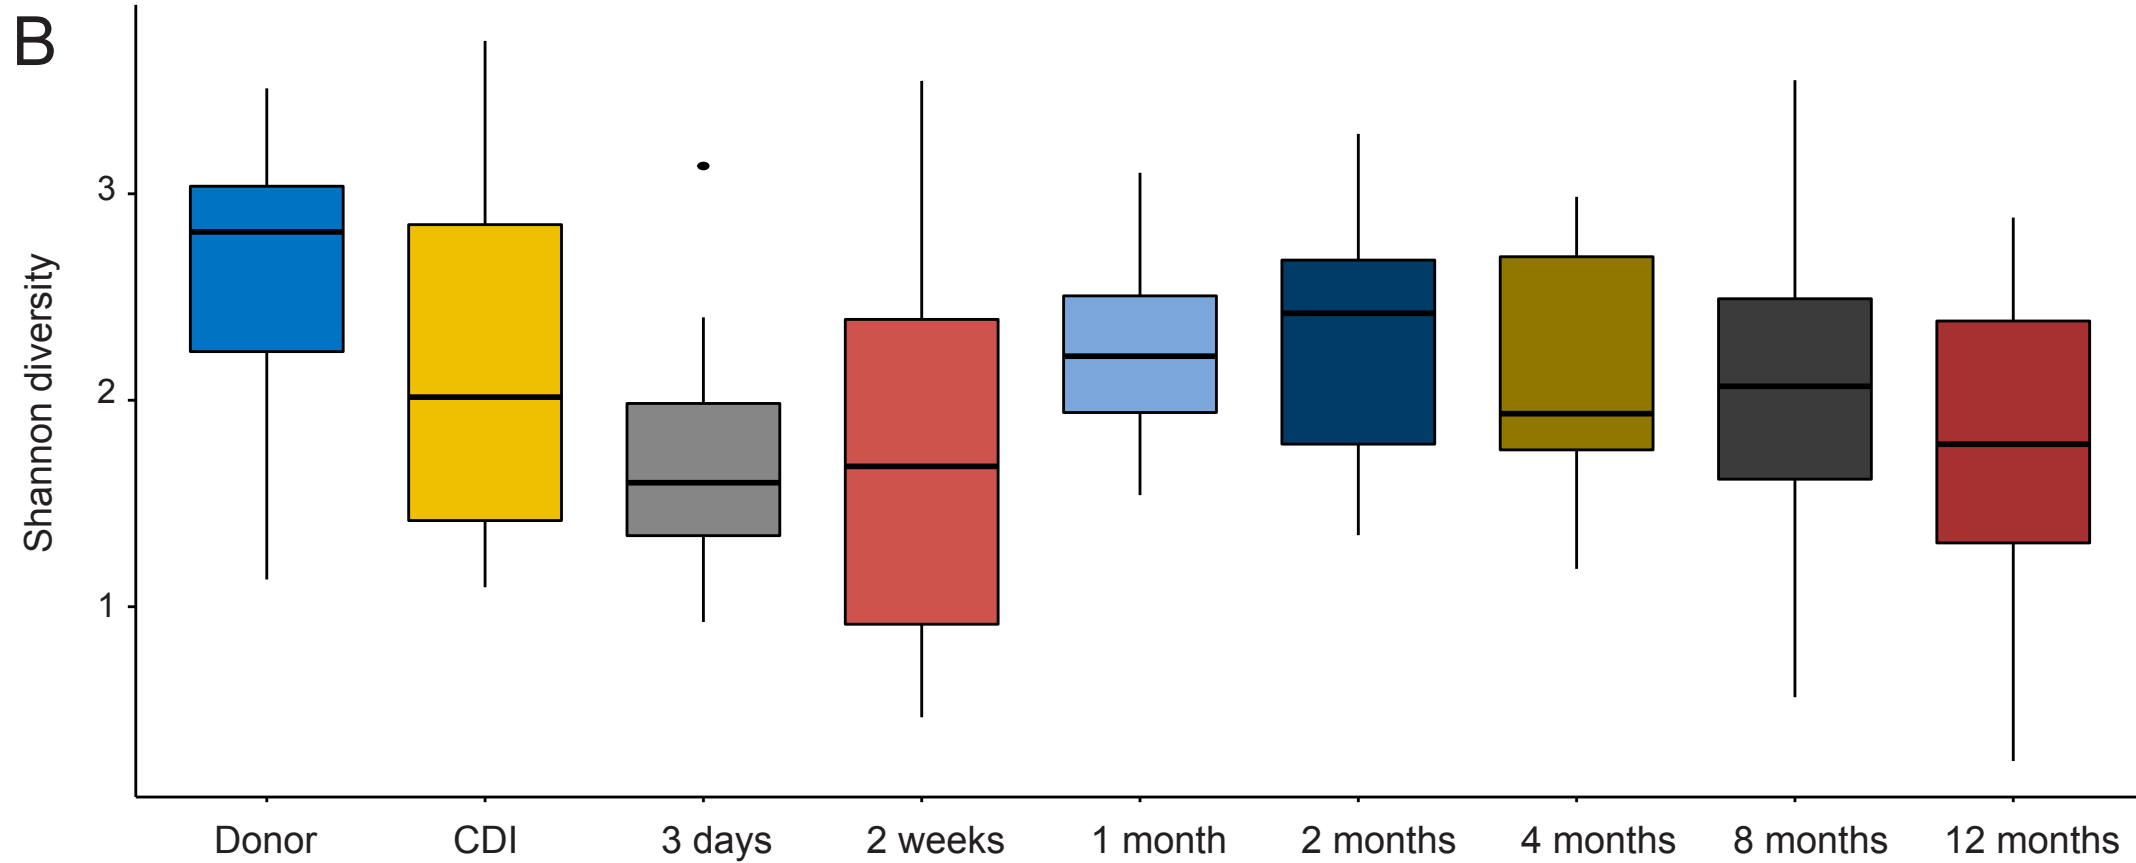

Supplement: 40168_2018_598_MOESM2_ESM.pdf [file 40168_2018_598_MOESM2_ESM.pdf]
